# Supplementary material for: (E)-1,2-Di(thiophen-2-yl)ethene based high mobility polymer for efficient photovoltaic devices without any post treatment
Source: Royal Society of Chemistry journal article supplement (doi:10.1039/c6ra13970a), 2016-01-01
Supplement: c6ra13970a1.pdf [file c6ra13970a1.pdf]

## Supporting information

### (*E*)-1,2-di(thiophen-2-yl)ethene based High Mobility Polymer for Efficient Photovoltaic devices without any Post Treatment

*Junzhen Ren<sup>a‡</sup>, Yongchao Zhang<sup>b‡</sup>, Fushuai Liu<sup>a</sup>, Yan Yan<sup>c</sup>, Meng Qiu<sup>b</sup>, V. A. L. Roy<sup>c</sup>, Huilin Zheng<sup>a</sup>, Mingliang Sun<sup>a\*</sup>, Renqiang Yang<sup>b\*</sup>*

<sup>a</sup>Institute of Material Science and Engineering, Ocean University of China, Qingdao 266100, People's Republic of China. Fax: 86-532- 66781927; Tel: 86-532-66781690; E-mail: [mlsun@ouc.edu.cn](mailto:mlsun@ouc.edu.cn)

<sup>b</sup>CAS Key Laboratory of Bio-based Materials, Qingdao Institute of Bioenergy and Bioprocess Technology, Chinese Academy of Sciences, Qingdao 266101, People's Republic of China. Fax: 86-532-80662778; Tel: 86-532-80662700; E-mail: [yangrq@qibebt.ac.cn](mailto:yangrq@qibebt.ac.cn)

<sup>c</sup>Center of Super-Diamond and Advanced Films (COSDAF), City University of Hong Kong, Hong Kong

<sup>‡</sup> J. Ren and Y. Zhang contributed equally to this work.

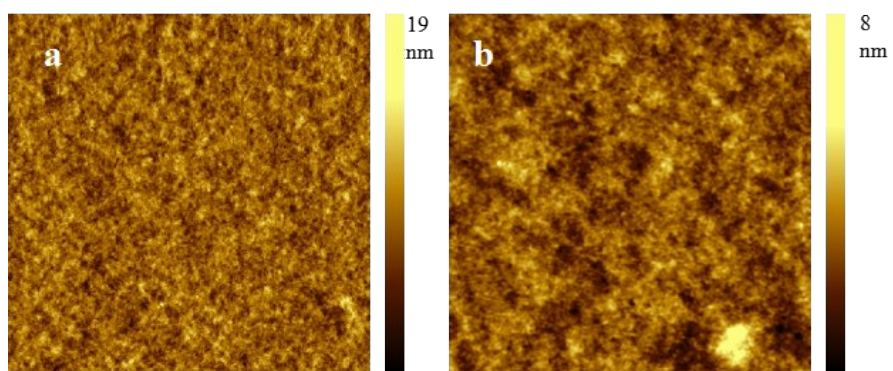

Figure S1 AFM topography of the PDT-DTBT-DT (a) and PTVT-DTBT-DT (b) films(scan size:  $5\ \mu\text{m} \times 5\ \mu\text{m}$ )

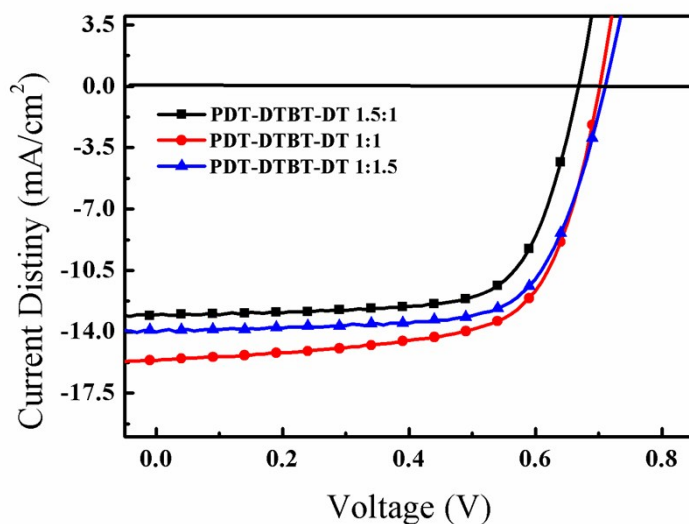

Figure S2 PSCs J-V curves based on PDT-DTBT-DT/PC<sub>71</sub>BM blends with different weight ratios.

Table S1 Photovoltaic Properties of PSCs Devices of PDT-DTBT-DT/PC<sub>71</sub>BM blends with different weight ratios

| Polymer     | Ratio | $V_{oc}$<br>(V) | $J_{sc}$<br>(mA/cm <sup>2</sup> ) | FF<br>(%) | PCE <sub>max</sub> /PCE <sub>ave</sub> |
|-------------|-------|-----------------|-----------------------------------|-----------|----------------------------------------|
| PDT-DTBT-DT | 1.5:1 | 0.70            | 13.68                             | 56.89     | 5.53/(5.22± 0.22)                      |
|             | 1:1   | 0.70            | 15.60                             | 66.62     | 7.29/(7.09± 0.19)                      |
|             | 1:1.5 | 0.71            | 13.94                             | 69.57     | 6.89/(6.69± 0.23)                      |

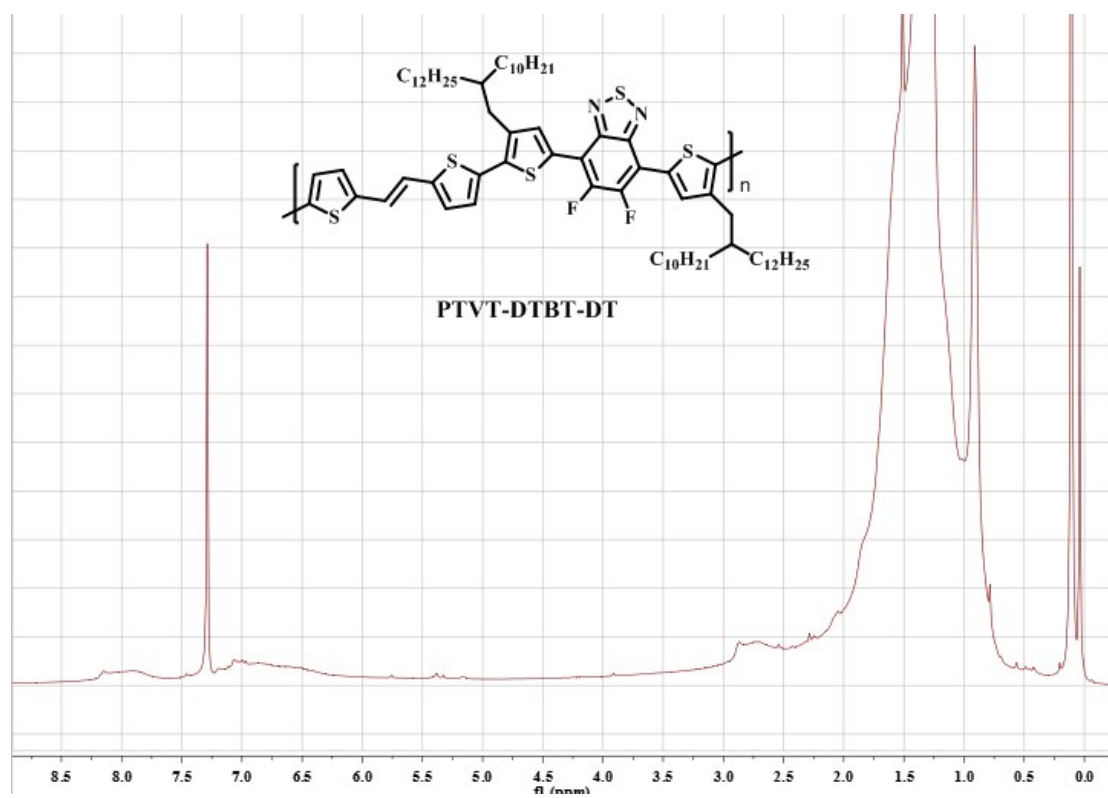

Figure S3 the  $^1\text{H}$  NMR spectrum of PTVT-DTBT-DT.

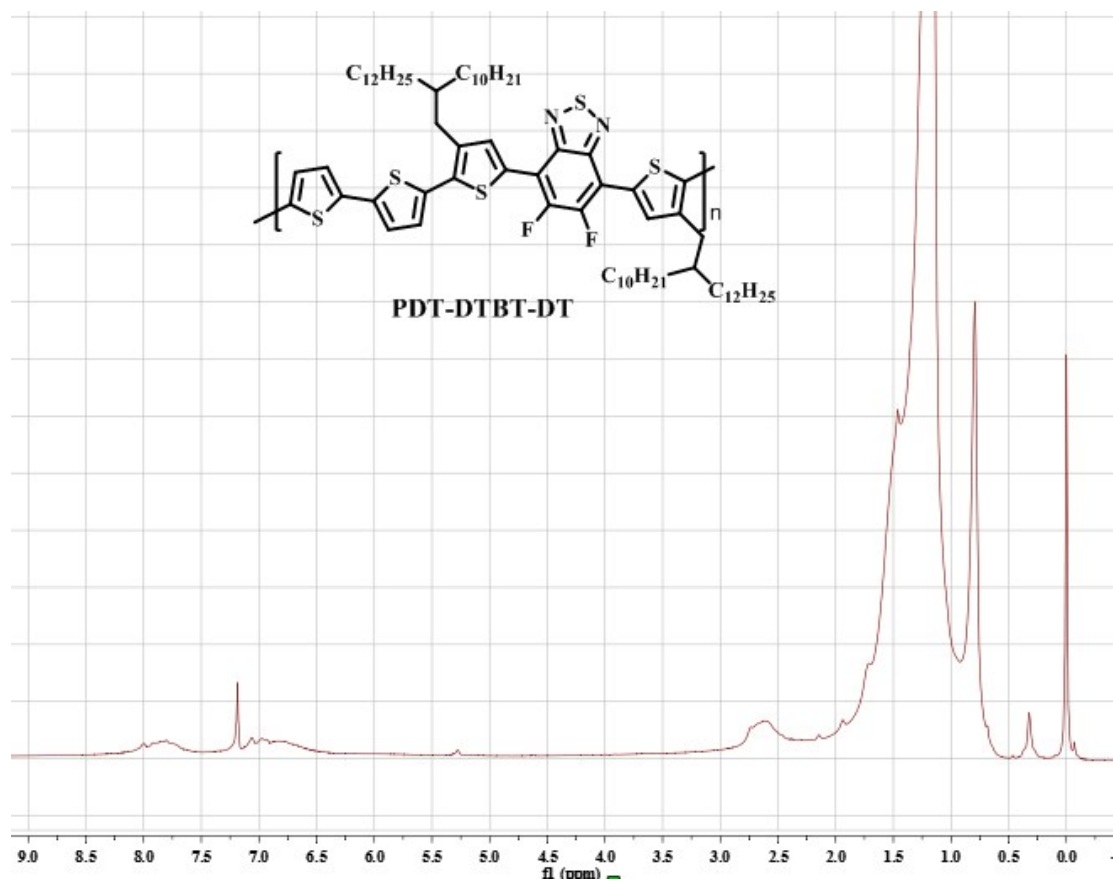

Figure S4 the <sup>1</sup>H NMR spectrum of PDT-DTBT-DT.
